# Supplementary material
Source: PubMed Central journal article supplement (PMC3735743)
Supplement: supp_121468_pressure-lv-1-at.pdf [file supp_121468_pressure-lv-1-at.pdf]

---

## Appendix 1 (as supplied by the authors): Searching strategy

### MEDLINE (OVID) AND

1. exp antihypertensive agents/
2. (antihypertensive\$ adj (agent\$ or drug)).tw.
3. chlorothiazide.tw.
4. chlorthalidone.tw.
5. hydralazine.tw.
6. hydrochlorothiazide.tw.
7. indapamide.tw.
8. minoxidil.tw.
9. exp angiotensin converting enzyme inhibitors/
10. captopril.tw.
11. enalapril.tw.
12. cilazapril.tw.
13. enalaprilat.tw.
14. fosinopril.tw.
15. lisinopril.tw.
16. perindopril.tw.
17. ramipril.tw.
18. saralasin.tw.
19. teprotide.tw.
20. exp losartan/
21. losartan.tw.
22. imidazole\$.tw.
23. irbesartan.tw.
24. candesartan.tw.
25. eprosartan.tw.
26. valsartan.tw.
27. olmesartan.tw.
28. telmisartan.tw.
29. (ace adj2 inhibitor\$).tw.
30. (angiotensin adj2 receptor antagonist\$).tw.
31. exp calcium channel blockers/
32. amlodipine.tw.
33. diltiazem.tw.
34. felodipine.tw.
35. nicardipine.tw.
36. nifedipine.tw.
37. nimodipine.tw.
38. nisoldipine.tw.
39. nitrendipine.tw.
40. verapamil.tw.
41. exp adrenergic beta-antagonists/
42. alprenolol.tw.
43. atenolol.tw.
- 43a. carvedilol.tw
- 43b. bisoprolol.tw
44. metoprolol.tw.
45. nadolol.tw.
46. oxprenolol.tw.

- 
47. pindolol.tw.
  48. propranolol.tw.
  49. exp adrenergic alpha-antagonists/
  50. labetalol.tw.
  51. prazosin.tw.
  52. beta block\$.tw.
  53. exp diuretics/
  54. spironolactone.tw.
  55. triamterene.tw.
  56. bumetanide.tw.
  57. furosemide.tw.
  58. or/1-57
  - 59.exp Clinical Trial/
  60. exp Random Allocation/
  61. exp Single Blind Method/
  62. exp Double Blind Method/
  63. (random\$ adj5 trial\$).tw.
  64. (random\$ adj5 allocation\$).tw.
  65. (Blind\$ adj5 method\$).tw.
  66. or/59-65
  67. (target level).mp
  68. (blood pressure adj6 target).mp
  69. (BP adj6 target).mp
  70. (blood pressure adj6 goal).mp
  71. (BP adj6 goal).mp
  72. (intensi\$ adj6 treatment).mp
  - 73.( intensi\$ adj6 control).mp
  - 74.( intensi\$ adj6 lowering).mp
  75. (intensi\$ adj6 blood pressure).mp
  76. (intensi\$ antihypertensive).mp
  77. (tight adj6 control).mp
  78. (tight adj6 blood pressure).mp
  79. (strict adj6 control).mp
  80. (strict adj6 blood pressure).mp
  81. or/67-80
  82. 58 and 66 and 81

**COCHRANE CONTROLLED TRIALS**

1. antihypertensive agents explode all trees
2. (antihypertensive\$ adj (agent\$ or drug))
3. chlorothiazide
4. chlorthalidone
5. hydralazine
6. hydrochlorothiazide
7. indapamide
8. minoxidil
9. angiotensin converting enzyme inhibitors explode all trees
10. captopril
11. enalapril
12. cilazapril
13. enalaprilat
14. fosinopril
15. lisinopril

Appendix to: Lv J, Ehteshami P, Sarnak MJ, et al. Effects of intensive blood pressure lowering on the progression of chronic kidney disease: a systematic review and meta-analysis. *CMAJ* 2013; DOI:10.1503/cmaj.121468.

Copyright © 2013 Canadian Medical Association or its licensors

- 
16. perindopril
  17. ramipril
  18. saralasin
  19. teprotide.
  20. losartan explode all trees
  21. losartan
  22. imidazole
  23. irbesartan
  24. candesartan
  25. eprosartan
  26. valsartan
  27. olmesartan
  28. telmisartan
  29. (ace adj2 inhibitor\$)
  30. (angiotensin adj2 receptor antagonist\$)
  31. calcium channel blockers explode all trees
  32. amlodipine
  33. diltiazem
  34. felodipine
  35. nicardipine
  36. nifedipine
  37. nimodipine
  38. nisoldipine
  39. nitrendipine
  40. verapamil
  41. adrenergic beta-antagonists explode all trees
  42. alprenolol
  43. atenolol
  - 43a. Carvedilol
  - 43b. bisoprolol
  44. metoprolol
  45. nadolol
  46. oxprenolol
  47. pindolol
  48. propranolol
  49. adrenergic alpha-antagonists explode all trees
  50. labetalol
  51. prazosin
  52. beta block
  53. diuretics explode all trees
  54. spironolactone
  55. triamterene
  56. bumetanide
  57. furosemide
  58. or/1-57
  59. (target level).mp
  60. (blood pressure adj6 target).mp
  61. (BP adj6 target).mp
  62. (blood pressure adj6 goal).mp
  63. (BP adj6 goal).mp
  64. (intensi\$ adj6 treatment).mp
  65. (intensi\$ adj6 control).mp
  66. (intensi\$ adj6 lowering).mp
  67. (intensi\$ adj6 blood pressure).mp
  68. (intensi\$ antihypertensive).mp

Appendix to: Lv J, Ehteshami P, Sarnak MJ, et al. Effects of intensive blood pressure lowering on the progression of chronic kidney disease: a systematic review and meta-analysis. *CMAJ* 2013; DOI:10.1503/cmaj.121468.

Copyright © 2013 Canadian Medical Association or its licensors

- 
69. (tight adj6 control).mp
  70. (tight adj6 blood pressure).mp
  71. (strict adj6 control).mp
  72. (strict adj6 blood pressure).mp
  73. or/59-72
  74. 58 and 73

**EMBASE**

1. antihypertensive agents
2. chlorothiazide
3. chlorthalidone
4. hydralazine
5. hydrochlorothiazide
6. indapamide
7. minoxidil
8. losartan
8. imidazole
10. irbesartan
11. candesartan
12. eprosartan
13. valsartan
14. olmesartan
15. telmisartan
16. angiotensin converting enzyme inhibitors
17. captopril
18. enalapril
19. fosinopril
20. lisinopril
21. perindopril
22. ramipril
23. saralasin
24. teprotide
25. Angiotensin 2 Receptor Antagonist
26. Angiotensin Receptor Antagonist
27. Angiotensin II Antagonist
28. AT 2 receptor blocker
29. AT 2 receptor antagonist
30. angiotensin receptor antagonist
31. Calcium Channel Blockers
32. amlodipine
33. diltiazem
34. felodipine
35. nicardipine
36. nifedipine
37. nimodipine
38. nisoldipine
39. nitrendipine
40. verapamil
41. adrenergic beta-antagonists
42. alprenolol
43. atenolol
44. carvedilol
45. bisoprolol
46. metoprolol
47. nadolol
48. oxprenolol

Appendix to: Lv J, Ehteshami P, Sarnak MJ, et al. Effects of intensive blood pressure lowering on the progression of chronic kidney disease: a systematic review and meta-analysis. *CMAJ* 2013; DOI:10.1503/cmaj.121468.

Copyright © 2013 Canadian Medical Association or its licensors

- 
49. pindolol
  50. propranolol
  51. adrenergic alpha-antagonists/
  52. labetalol
  53. prazosin
  54. diuretics
  55. spironolactone
  56. triamterene
  57. bumetanide
  58. furosemide
  59. clinical and trial
  60. randomized and controlled and trial
  61. random and allocation
  62. single blind and method
  63. double blind and method
  64. target level
  65. target blood pressure
  66. Target systolic blood pressure
  67. Target diastolic blood pressure
  68. Intensive treatment
  69. Intensive blood pressure treatment
  70. Intensive antihypertensive treatment
  71. Intensive control
  72. Intensive blood pressure control
  73. Tight control
  74. Tight blood pressure control
  75. Strict control
  76. Strict blood pressure control
  77. or/1-58
  78. or/59-63
  79. or/64-76
  80. #77 and #78 and #79

---

## References

1. James MT, Hemmelgarn BR, Tonelli M. Early recognition and prevention of chronic kidney disease. *Lancet*. 2010; **375**(9722): 1296-309.
2. Heerspink HJ, Ninomiya T, Perkovic V, et al. Effects of a fixed combination of perindopril and indapamide in patients with type 2 diabetes and chronic kidney disease. *Eur Heart J*. 2010; **31**(23): 2888-96.
3. Ruilope LM, Salvetti A, Jamerson K, et al. Renal function and intensive lowering of blood pressure in hypertensive participants of the hypertension optimal treatment (HOT) study. *J Am Soc Nephrol*. 2001; **12**(2): 218-25.
4. Jafar TH, Stark PC, Schmid CH, et al. Progression of chronic kidney disease: the role of blood pressure control, proteinuria, and angiotensin-converting enzyme inhibition: a patient-level meta-analysis. *Ann Intern Med*. 2003; **139**(4): 244-52.
5. Klag MJ, Whelton PK, Randall BL, Neaton JD, Brancati FL, Ford CE, et al. Blood pressure and end-stage renal disease in men. *N Engl J Med*. 1996; **334**(1): 13-8.
6. Tozawa M, Iseki K, Iseki C, Kinjo K, Ikemiya Y, Takishita S. Blood pressure predicts risk of developing end-stage renal disease in men and women. *Hypertension*. 2003; **41**(6): 1341-5.
7. Perkovic V, Huxley R, Wu Y, Prabhakaran D, MacMahon S. The burden of blood pressure-related disease: a neglected priority for global health. *Hypertension*. 2007; **50**(6): 991-7.
8. K/DOQI clinical practice guidelines for chronic kidney disease: evaluation, classification, and stratification. *Am J Kidney Dis*. 2002; **39**(2 Suppl 1): S1-266.
9. Chobanian AV, Bakris GL, Black HR, Cushman WC, Green LA, Izzo JL, Jr., et al. The Seventh Report of the Joint National Committee on Prevention, Detection, Evaluation, and Treatment of High Blood Pressure: the JNC 7 report. *JAMA*. 2003; **289**(19): 2560-72.
10. Mancia G, Laurent S, Agabiti-Rosei E, Ambrosioni E, Burnier M, Caulfield MJ, et al. Reappraisal of European guidelines on hypertension management: a European Society of Hypertension Task Force document. *J Hypertens*. 2009; **27**(11): 2121-58.
11. Peterson JC, Adler S, Burkart JM, Greene T, Hebert LA, Hunsicker LG, et al. Blood pressure control, proteinuria, and the progression of renal disease. The Modification of Diet in Renal Disease Study. *Ann Intern Med*. 1995; **123**(10): 754-62.
12. Sarnak MJ, Greene T, Wang X, Beck G, Kusek JW, Collins AJ, et al. The effect of a lower target blood pressure on the progression of kidney disease: long-term follow-up of the modification of diet in renal disease study. *Annals of internal medicine*. 2005; **142**(5): 342-51.
13. Appel LJ, Wright JT, Jr., Greene T, Agodoa LY, Astor BC, Bakris GL, et al. Intensive blood-pressure control in hypertensive chronic kidney disease. *N Engl J Med*. 2010; **363**(10): 918-29.
14. Ruggenenti P, Perna A, Loriga G, Ganeva M, Ene-Iordache B, Turturro M, et al. Blood-pressure control for renoprotection in patients with non-diabetic chronic renal disease (REIN-2): multicentre, randomised controlled trial. *Lancet*. 2005; **365**(9463): 939-46.
15. Upadhyay A, Earley A, Haynes SM, Uhlig K. Systematic review: blood pressure target in chronic kidney disease and proteinuria as an effect modifier. *Ann Intern Med*. 2011; **154**(8): 541-8.
16. Liberati A, Altman DG, Tetzlaff J, Mulrow C, Gotzsche PC, Ioannidis JP, et al. The PRISMA statement for reporting systematic reviews and meta-analyses of studies that evaluate health care interventions: explanation and elaboration. *Ann Intern Med*. 2009; **151**(4): W65-94.
17. Klahr S, Levey AS, Beck GJ, Caggiula AW, Hunsicker L, Kusek JW, et al. The effects of dietary protein restriction and blood-pressure control on the progression of chronic renal disease. Modification of Diet in Renal Disease Study Group. *N Engl J Med*. 1994; **330**(13): 877-84.
18. Wuhl E, Trivelli A, Picca S, Litwin M, Peco-Antic A, Zurowska A, et al. Strict blood-pressure control and progression of renal failure in children. *N Engl J Med*. 2009; **361**(17): 1639-50.
19. M. W. *Epidemiology: design and data analysis*, 2nd edn. Boca Raton, Florida, USA: Chapman and Hall/CRC Press. 2005.
20. Egger M, Davey Smith G, Schneider M, Minder C. Bias in meta-analysis detected by a simple, graphical test. *BMJ*. 1997; **315**(7109): 629-34.
21. Toto RD, Mitchell HC, Smith RD, Lee HC, McIntire D, Pettinger WA. "Strict" blood pressure control and progression of renal disease in hypertensive nephrosclerosis. *Kidney Int*. 1995; **48**(3): 851-9.
22. Tight blood pressure control and risk of macrovascular and microvascular complications in type 2 diabetes: UKPDS 38. UK Prospective Diabetes Study Group. *BMJ*. 1998; **317**(7160): 703-13.
23. Hansson L, Zanchetti A, Carruthers SG, Dahlof B, Elmfeldt D, Julius S, et al. Effects of intensive blood-pressure lowering and low-dose aspirin in patients with hypertension: principal results of the

Appendix to: Lv J, Ehteshami P, Sarnak MJ, et al. Effects of intensive blood pressure lowering on the progression of chronic kidney disease: a systematic review and meta-analysis. *CMAJ* 2013; DOI:10.1503/cmaj.121468.

- 
- Hypertension Optimal Treatment (HOT) randomised trial. HOT Study Group. *Lancet*. 1998; **351**(9118): 1755-62.
24. Estacio RO, Jeffers BW, Gifford N, Schrier RW. Effect of blood pressure control on diabetic microvascular complications in patients with hypertension and type 2 diabetes. *Diabetes Care*. 2000; **23 Suppl 2**: B54-64.
25. Schrier RW, Estacio RO, Esler A, Mehler P. Effects of aggressive blood pressure control in normotensive type 2 diabetic patients on albuminuria, retinopathy and strokes. *Kidney Int*. 2002; **61**(3): 1086-97.
26. Wright JT, Jr., Bakris G, Greene T, Agodoa LY, Appel LJ, Charleston J, et al. Effect of blood pressure lowering and antihypertensive drug class on progression of hypertensive kidney disease: results from the AASK trial. *JAMA*. 2002; **288**(19): 2421-31.
27. Hayashi K, Saruta T, Goto Y, Ishii M. Impact of renal function on cardiovascular events in elderly hypertensive patients treated with efonidipine. *Hypertens Res*. 2010; **33**(11): 1211-20.
28. Schrier R, McFann K, Johnson A, Chapman A, Edelstein C, Brosnahan G, et al. Cardiac and renal effects of standard versus rigorous blood pressure control in autosomal-dominant polycystic kidney disease: results of a seven-year prospective randomized study. *J Am Soc Nephrol*. 2002; **13**(7): 1733-9.
29. Hayashi K, Saruta T, Goto Y, Ishii M, Group JS. Impact of renal function on cardiovascular events in elderly hypertensive patients treated with efonidipine. *Hypertension Research Clinical & Experimental*. 2011; **33**(11): 1211-20.
31. Mancia G, De Backer G, Dominiczak A, Cifkova R, Fagard R, Germano G, et al. 2007 Guidelines for the Management of Arterial Hypertension: The Task Force for the Management of Arterial Hypertension of the European Society of Hypertension (ESH) and of the European Society of Cardiology (ESC). *J Hypertens*. 2007; **25**(6): 1105-87.
32. S L. Blood pressure, cholesterol and premature death: towards the real relationships. 1999.
33. Klag MJ WP, Randall BL, Neaton JD, Brancati FL, Ford CE, Shulman NB, Stamler J. Blood pressure and end-stage renal disease in men. *N Engl J Med*. 1996; **334**(1): 13-8.
34. O'Seaghdha CM PV, Lam TH, McGinn S, Barzi F, Gu DF, Cass A, Suh I, Muntner P, Giles GG, Ueshima H, Woodward M, Huxley R; Asia Pacific Cohort Studies Collaboration. Blood pressure is a major risk factor for renal death: an analysis of 560 352 participants from the Asia-Pacific region. *Hypertension*. 2009; **54**(3): 509-15.
35. Appel LJ, Anderson CA. Compelling evidence for public health action to reduce salt intake. *N Engl J Med*. 2010; **362**(7): 650-2.
36. Gerstein HC, Miller ME, Byington RP, Goff DC, Jr., Bigger JT, Buse JB, et al. Effects of intensive glucose lowering in type 2 diabetes. *N Engl J Med*. 2008; **358**(24): 2545-59.
37. Lv J, Neal B, Ehteshami P, Ninomiya T, Woodward M, Rodgers A, et al. Effects of intensive blood pressure lowering on cardiovascular and renal outcomes: a systematic review and meta-analysis. *PLoS medicine*. 2012; **9**(8): e1001293.
