# Supplementary material
Source: PubMed Central journal article supplement (PMC3735743)
Supplement: supp_121468_pressure-lv-2-at.pdf [file supp_121468_pressure-lv-2-at.pdf]

## Appendix 2 (as supplied by the authors): Risk of bias

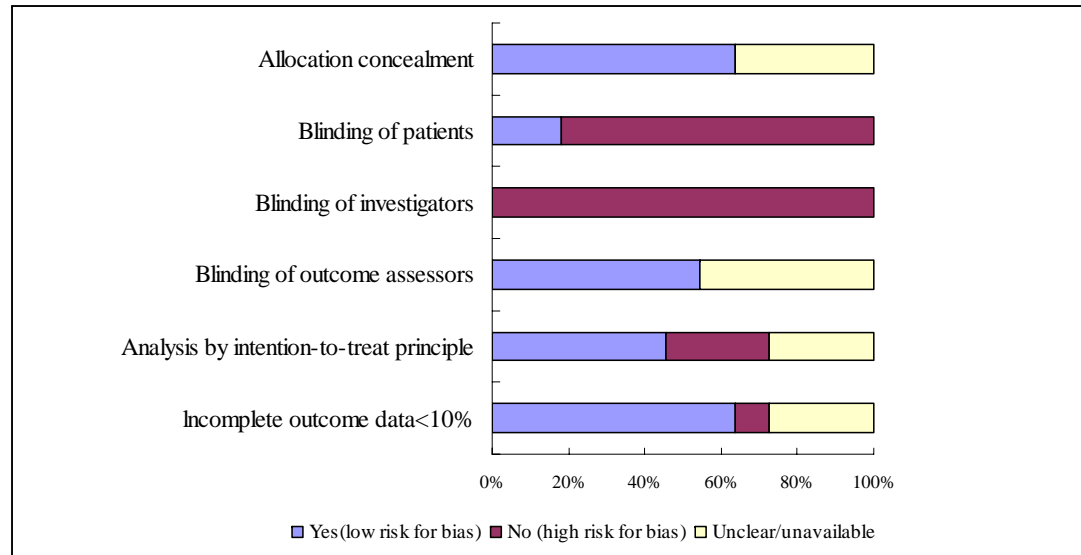

We assessed study risk for bias according to recommendations from the Cochrane Collaboration:

Allocation concealment: whether the study reported methods to conceal the allocation sequence in sufficient detail to determine whether intervention allocations could have been predicted in advance of patient enrollment;

Blinding: Methods by which patients, investigators, or outcomes assessors are protected from being aware of the treatment allocations after patients are included in the study; The two ABCD studies were blinded to the patients.

Intention-to-treat analysis: whether the study conducted the major analyses according to the patients' treatment assignment at the time of randomization.

Incomplete outcome data: whether the study described the completeness of outcome data for the primary outcomes.
