# Supplementary material
Source: PubMed Central journal article supplement (PMC3735743)

**Appendix 3 (as supplied by the authors): Begg's funnel plot for the assessment of publication bias in studies examining the effect of intensive blood pressure lowering on kidney failure**

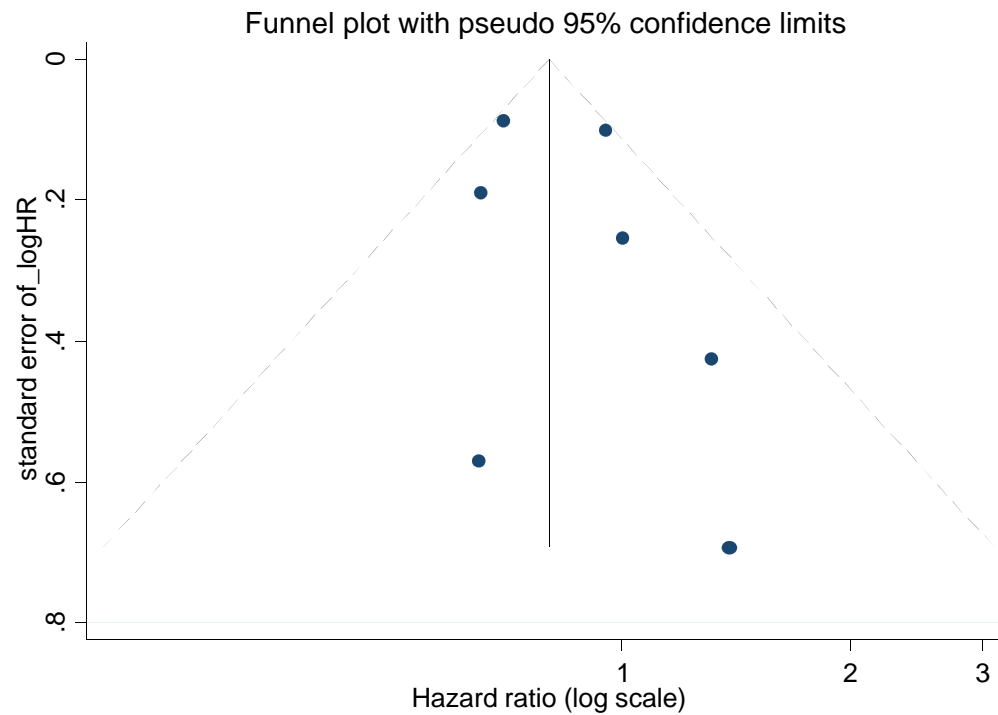

Supplement: supp_121468_pressure-lv-3-at.pdf [file supp_121468_pressure-lv-3-at.pdf]
