# Supplementary material
Source: PubMed Central journal article supplement (PMC3735743)

## Appendix 4 (as supplied by the authors): Subgroup analysis of intensive blood pressure lowering on kidney failure

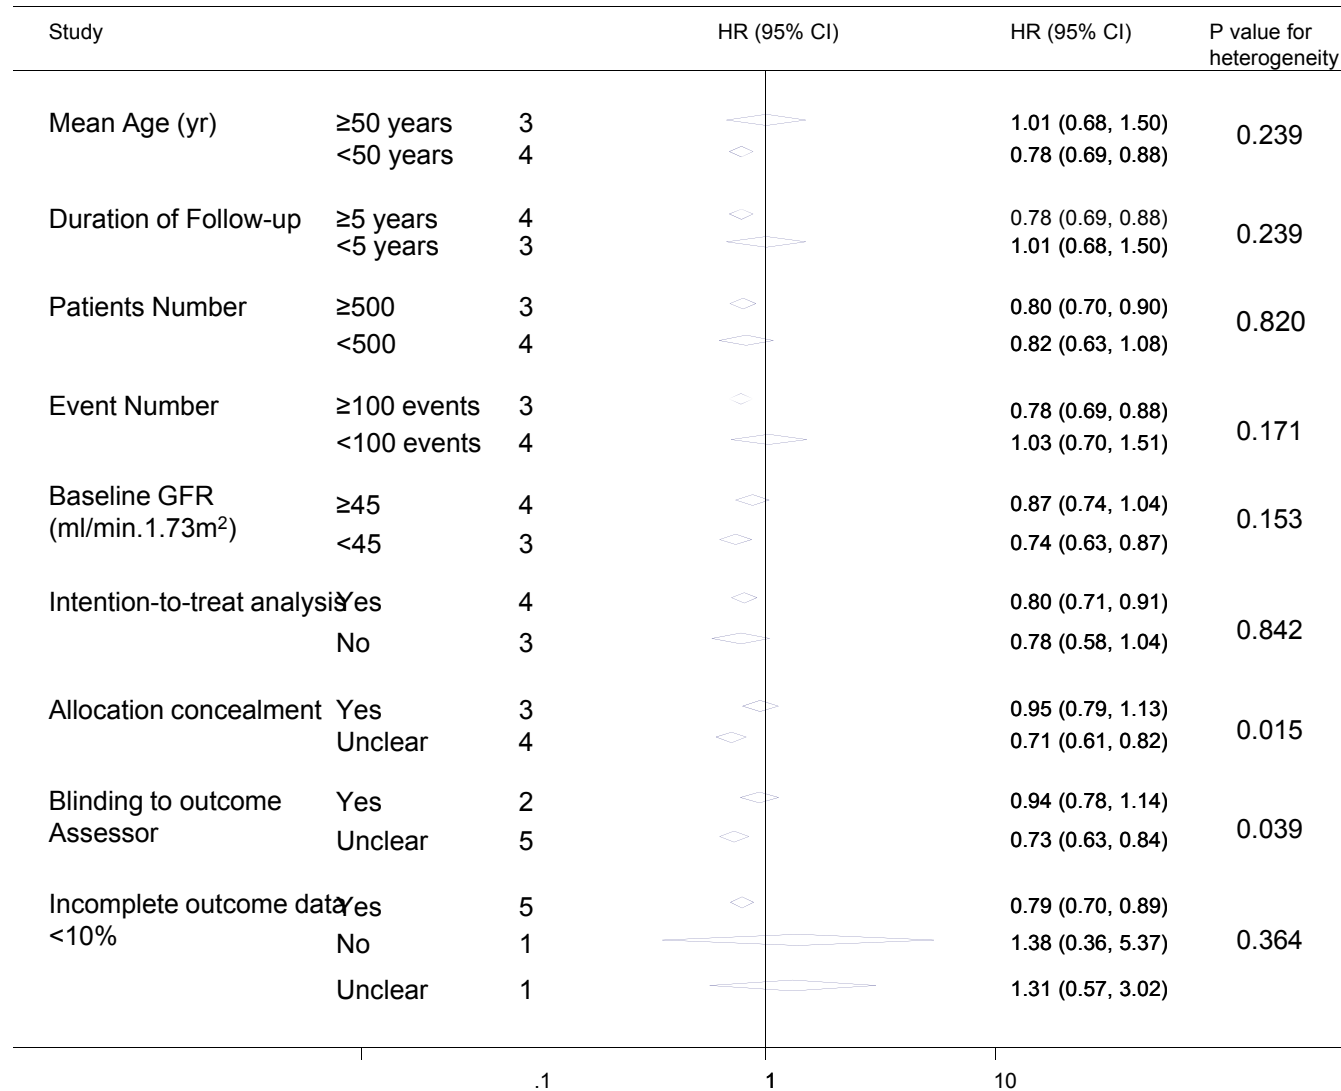

Supplement: supp_121468_pressure-lv-4-at.pdf [file supp_121468_pressure-lv-4-at.pdf]
