# Supplementary material
Source: PubMed Central journal article supplement (PMC3735743)

Appendix 5 (as supplied by the authors): Intensive blood pressure lowering and cardiovascular outcomes in patients with chronic kidney disease

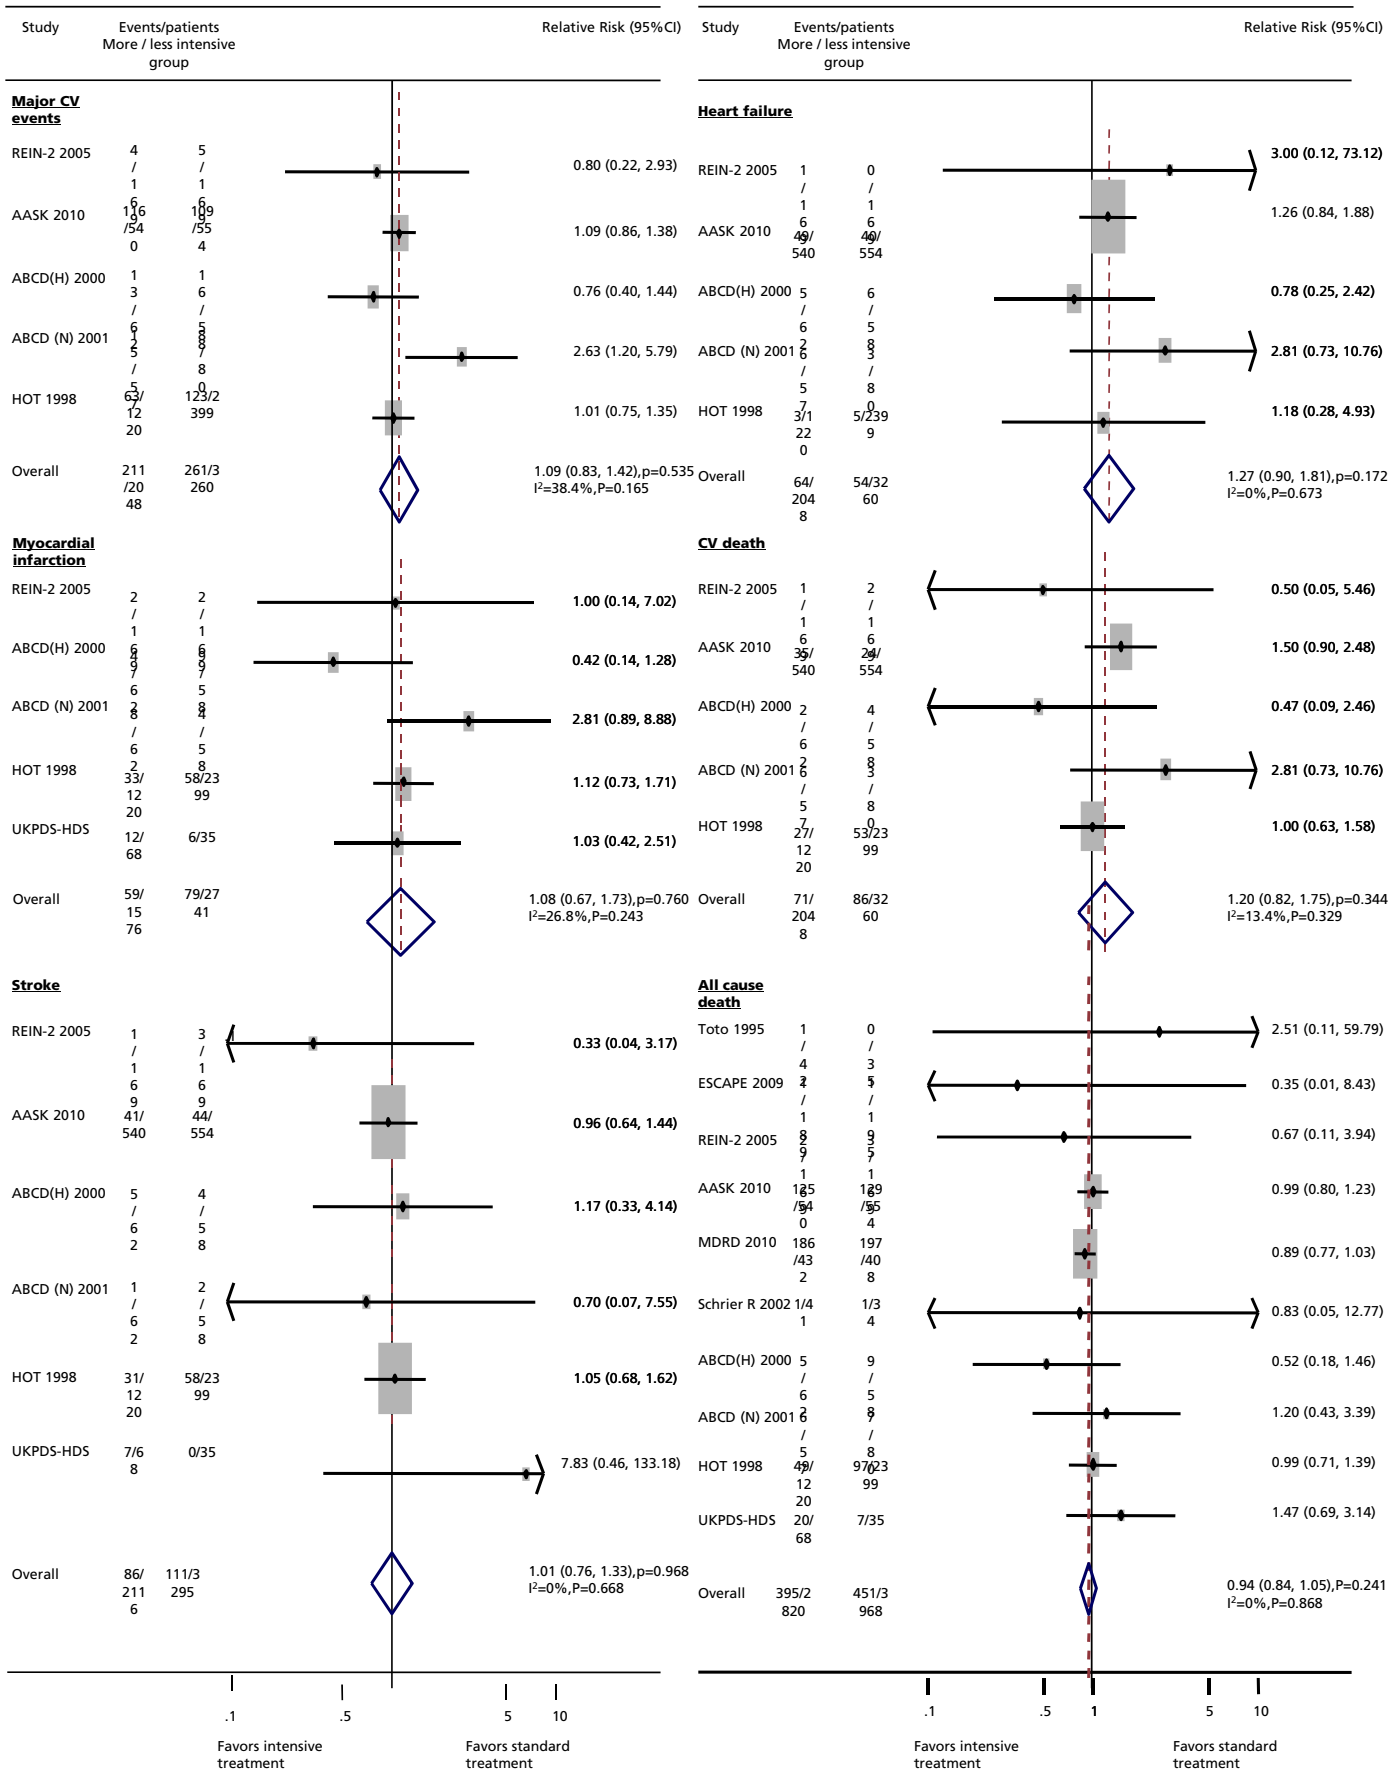

Supplement: supp_121468_pressure-lv-5-at.pdf [file supp_121468_pressure-lv-5-at.pdf]
